# Supplementary material for: The TLR1 gene is associated with higher protection from leprosy in women
Source: PubMed Central journal article supplement (PMC6173409; doi:10.1371/journal.pone.0205234), 2018-10-05
Supplement: pone.0205234.s003.pdf [file pone.0205234.s003.pdf]

S1 Appendix. Questionnaire for data collection

Leprosy patient questionnaire

| Identification                                                                                               |                        |                          |
|--------------------------------------------------------------------------------------------------------------|------------------------|--------------------------|
| Interview date: / /                                                                                          | Interviewer:           | City:                    |
| Health unit:                                                                                                 |                        |                          |
| Name:                                                                                                        |                        | Nickname:                |
| Current address:                                                                                             |                        |                          |
| e-mail:                                                                                                      |                        |                          |
| Age:                                                                                                         | Date of birth: / /     | Sex: ( ) Male ( ) Female |
| Ethnic group: ( ) Black ( ) White ( ) Indigenous ( ) Mestizo                                                 |                        |                          |
| City of birth:                                                                                               |                        | State:                   |
| Someone who resided with you up to 5 years before you had leprosy moved?<br>( ) No ( ) Yes. How many people? |                        |                          |
| Epidemiological data                                                                                         |                        |                          |
| Any other residents have or had leprosy? ( ) No ( ) Yes. How many?                                           |                        |                          |
| Besides leprosy, you had or have another disease?<br>( ) No<br>( ) Yes. Specify:                             |                        |                          |
| Are you pregnant? ( ) No ( ) Yes ( ) Not applicable<br>What is your gestational age?                         |                        |                          |
| Do you suspect pregnancy?                                                                                    |                        |                          |
| Do you use any medication regularly?<br>( ) No ( ) Yes. Specify:                                             |                        |                          |
| Clinical information                                                                                         |                        |                          |
| Registration number in SINAN:                                                                                |                        |                          |
| Treatment start date: / /                                                                                    | End date of treatment: | Therapeutic scheme:      |
| Operational classification: ( ) Paucibacillary ( ) Multibacillary                                            |                        |                          |

### Household contact questionnaire

| Identification                                                                                                                                                                                                                                                                                                                                                                              |                                                                                                                                                                                                                                                                                                                                                                                                                                                            |                                                                                                                                                                                           |
|---------------------------------------------------------------------------------------------------------------------------------------------------------------------------------------------------------------------------------------------------------------------------------------------------------------------------------------------------------------------------------------------|------------------------------------------------------------------------------------------------------------------------------------------------------------------------------------------------------------------------------------------------------------------------------------------------------------------------------------------------------------------------------------------------------------------------------------------------------------|-------------------------------------------------------------------------------------------------------------------------------------------------------------------------------------------|
| Interview date: / /                                                                                                                                                                                                                                                                                                                                                                         | Interviewer:                                                                                                                                                                                                                                                                                                                                                                                                                                               | City:                                                                                                                                                                                     |
| Health unit:                                                                                                                                                                                                                                                                                                                                                                                |                                                                                                                                                                                                                                                                                                                                                                                                                                                            |                                                                                                                                                                                           |
| Name:                                                                                                                                                                                                                                                                                                                                                                                       |                                                                                                                                                                                                                                                                                                                                                                                                                                                            | Nickname:                                                                                                                                                                                 |
| Current address:                                                                                                                                                                                                                                                                                                                                                                            |                                                                                                                                                                                                                                                                                                                                                                                                                                                            |                                                                                                                                                                                           |
| e-mail:                                                                                                                                                                                                                                                                                                                                                                                     |                                                                                                                                                                                                                                                                                                                                                                                                                                                            |                                                                                                                                                                                           |
| Age:                                                                                                                                                                                                                                                                                                                                                                                        | Date of birth: / /                                                                                                                                                                                                                                                                                                                                                                                                                                         | Sex: ( ) Male ( ) Female                                                                                                                                                                  |
| Ethnic group: ( ) Black ( ) White ( ) Indigenous ( ) Mestizo                                                                                                                                                                                                                                                                                                                                |                                                                                                                                                                                                                                                                                                                                                                                                                                                            |                                                                                                                                                                                           |
| City of birth:                                                                                                                                                                                                                                                                                                                                                                              |                                                                                                                                                                                                                                                                                                                                                                                                                                                            | State:                                                                                                                                                                                    |
| Epidemiological data                                                                                                                                                                                                                                                                                                                                                                        |                                                                                                                                                                                                                                                                                                                                                                                                                                                            |                                                                                                                                                                                           |
| Have you ever had leprosy? ( ) No ( ) Yes                                                                                                                                                                                                                                                                                                                                                   |                                                                                                                                                                                                                                                                                                                                                                                                                                                            |                                                                                                                                                                                           |
| Do you had or have another disease? ( ) No ( ) Yes. Specify:                                                                                                                                                                                                                                                                                                                                |                                                                                                                                                                                                                                                                                                                                                                                                                                                            |                                                                                                                                                                                           |
| Are you pregnant? ( ) No ( ) Yes ( ) Not applicable                                                                                                                                                                                                                                                                                                                                         |                                                                                                                                                                                                                                                                                                                                                                                                                                                            |                                                                                                                                                                                           |
| What is your gestational age?                                                                                                                                                                                                                                                                                                                                                               |                                                                                                                                                                                                                                                                                                                                                                                                                                                            |                                                                                                                                                                                           |
| Do you suspect pregnancy?                                                                                                                                                                                                                                                                                                                                                                   |                                                                                                                                                                                                                                                                                                                                                                                                                                                            |                                                                                                                                                                                           |
| Dermatoneurological evaluation                                                                                                                                                                                                                                                                                                                                                              |                                                                                                                                                                                                                                                                                                                                                                                                                                                            |                                                                                                                                                                                           |
| Suggestive signs of leprosy? ( ) No ( ) Yes. Specify:                                                                                                                                                                                                                                                                                                                                       |                                                                                                                                                                                                                                                                                                                                                                                                                                                            |                                                                                                                                                                                           |
| <b>Dermatological evaluation</b><br><br>Skin lesions?<br>( ) No ( ) Yes How many?<br><br>Skin lesions with sensory loss?<br>( ) No ( ) Yes How many?<br><br>Skin plaques?<br>( ) No ( ) Yes How many?<br><br>Tubercles?<br>( ) No ( ) Yes How many?<br><br>Nodules?<br>( ) No ( ) Yes How many?<br><br>Infiltration?<br>( ) No ( ) Yes How many?<br><br>Others?<br>( ) No ( ) Yes How many? | <b>Neurological evaluation</b><br><br>Thickened nerves?<br>( ) No ( ) Yes.<br><br>Specify:<br>( ) Ulnar<br>( ) Radial<br>( ) Lateral popliteal<br>( ) Posterior tibial<br><br>Reduced muscle strenght<br>( ) No ( ) Yes.<br><br>Specify:<br>( ) Eyelids<br>( ) Abductor of the fifth finger<br>( ) Abductor of the thumb<br>( ) Wrist extensor<br>( ) Halux extensor<br>( ) Long extensor of toes<br>( ) Tibialis anterior muscle<br>( ) Peroneous muscles | <b>Sensitivity test</b><br><br>Sensory deficit?<br>( ) No ( ) Yes.<br><br>Specify:<br>( ) Left eye<br>( ) Right eye<br>( ) Left hand<br>( ) Right hand<br>( ) Left foot<br>( ) Right foot |
| Confirmed diagnosis? ( ) No ( ) Yes ( ) Not evaluated ( ) Not applicable                                                                                                                                                                                                                                                                                                                    |                                                                                                                                                                                                                                                                                                                                                                                                                                                            |                                                                                                                                                                                           |
| Information related to the case                                                                                                                                                                                                                                                                                                                                                             |                                                                                                                                                                                                                                                                                                                                                                                                                                                            |                                                                                                                                                                                           |
| Degree of kinship:                                                                                                                                                                                                                                                                                                                                                                          |                                                                                                                                                                                                                                                                                                                                                                                                                                                            |                                                                                                                                                                                           |
